# Supplementary material for: Temporal Trends and Factors Associated With the Inclusion of Patient‐Reported Outcomes in Heart Failure Randomized Controlled Trials: A Systematic Review
Source: PubMed Central journal article supplement — J Am Heart Assoc. 2021 Oct 23;10(21):e022353. doi: 10.1161/JAHA.121.022353 (PMC8751837; doi:10.1161/jaha.121.022353), 2021-10-23
Supplement: JAH3-10-e022353-s001.pdf [file JAH3-10-e022353-s001.pdf]

# **SUPPLEMENTAL MATERIAL**

**Table S1. Search strategy.**

- 1 Heart failure.mp or Heart Failure/
- 2 Limit 1 to (English language or humans)
- 3 Limit 2 to yr=\*2000-Current\*
- 4 Limit 3 to randomized controlled trial
- 5 Limit 4 to (meta-analysis or "review" or systematic reviews)
- 6 Limit 4 not 5

**Table S2. The Consolidated Standards of Reporting Trials (CONSORT-PRO) recommendations for the reporting of randomized controlled trials with patient-reported outcome (PROs).**

| Section            | Item             | Descriptor of PRO-specific statement                                                                         | Scoring criteria                                                                                                                 |
|--------------------|------------------|--------------------------------------------------------------------------------------------------------------|----------------------------------------------------------------------------------------------------------------------------------|
| Title and Abstract | P1b              | PRO identified in the abstract as a primary or secondary outcome                                             | 1 point = item reported<br>0 point= item not reported                                                                            |
| Introduction       |                  |                                                                                                              |                                                                                                                                  |
|                    | 2a               | Relevant background and rationale for why PROs were assessed are described                                   | 1 point = item reported<br>0 point= item not reported                                                                            |
|                    | P2b              | PRO and specified PRO domains hypotheses stated in the background                                            | 1 point = if hypothesis is stated and/or PRO domains specified in hypothesis                                                     |
| Methods            |                  |                                                                                                              |                                                                                                                                  |
|                    | P6a <sub>1</sub> | Evidence of PRO instrument validity, reliability, and responsiveness are cited                               | 1 point = if evidence of PRO validity, reliability and responsiveness was cited for at least one instrument                      |
|                    | P6a <sub>2</sub> | When or how PRO data was collected are described                                                             | 1 point = if the method of data collection (paper, telephone, electronic, other) and/or when PRO data was collected is described |
|                    | P12a             | Statistical approaches for dealing with PROs missing data                                                    | 1 point = item reported<br>0 point= item not reported                                                                            |
|                    | 13a              | Number of participants who completed PROs at subsequent trial phases are described in the study flow diagram | 1 point = item reported<br>0 point= item not reported<br>N/A = trial did not publish study flow chart                            |
| Results            |                  |                                                                                                              |                                                                                                                                  |
|                    | 15               | Baseline PRO data are reported                                                                               | 1 point = if stated in the demographics table (i.e., table 1) or reported in the results section                                 |
|                    | 17a              | PRO findings from one or more domains and time points are described with effect size and precision estimate  | 1 point = if PRO findings from one or several domains reported with effect size and precision estimate                           |

## Discussion

|        |                                                                                                                                        |                                                                                                                          |
|--------|----------------------------------------------------------------------------------------------------------------------------------------|--------------------------------------------------------------------------------------------------------------------------|
| P20/21 | PRO-specific limitations, and implications for the generalizability of study findings and their use in clinical practice are discussed | 1 point = if PRO-specific limitations or implications for generalizability and/or use in clinical practice are discussed |
| 22     | PRO data are interpreted in relation to other clinical outcomes                                                                        | 1 point = item reported<br>0 point = item not reported                                                                   |

---

Scores ranged between zero and eleven. Table adapted from Calvert et al., (2013)<sup>7</sup> for the recommended five PRO-specific items (prefixed with the letter 'P'), selected sub-items, and modified items (e.g., P6a).

\*Primary CONSORT-PRO items were prefixed with the letter P. Selected items not denoted with the letter P were adapted from the CONSORT-2010 statement based on CONSORT-PRO group suggestions. Abbreviation: PROs, patient-reported outcomes; RCT, randomized controlled trial.
